# Supplementary material for: Transcriptome Sequencing and Analysis of Leaf Tissue of Avicennia marina Using the Illumina Platform
Source: PLoS One. 2014 Sep 29;9(9):e108785. doi: 10.1371/journal.pone.0108785 (PMC4181315; doi:10.1371/journal.pone.0108785)
Supplement: Table S4 — Numbers of Avicennia marina unigenes with hits in 184 fungal species. (XLSX) [file pone.0108785.s006.xlsx]

## Sheet: Sheet1
Fungal species	Number of matched unigenes
Pyrenophora tritici-repentis	2232
Phaeosphaeria nodorum	520
Penicillium chrysogenum	325
Aspergillus fumigatus	143
Cryptococcus neoformans	131
Verticillium albo-atrum	121
Microsporum canis	62
Yarrowia lipolytica	51
Ajellomyces capsulatus	50
Ajellomyces dermatitidis	48
Neurospora crassa	47
Aspergillus nidulans	46
Ajellomyces dermatitidis	44
Coccidioides posadasii	43
Aspergillus flavus	38
Phytophthora infestans	36
Ajellomyces capsulatus	29
Botryotinia fuckeliana	29
Paracoccidioides brasiliensis	29
Talaromyces stipitatus	27
Neosartorya fischeri	26
Aspergillus clavatus	25
Alternaria alternata	24
Leptosphaeria maculans	24
Magnaporthe grisea	24
Candida albicans	21
Schizosaccharomyces pombe	21
Phaeosphaeria nodorum	20
Zygosaccharomyces rouxii	20
Candida glabrata	19
Debaryomyces hansenii	19
Schizosaccharomyces japonicus	18
Aspergillus terreus	17
Paracoccidioides brasiliensis	17
Postia placenta	17
Saccharomyces cerevisiae	17
Paracoccidioides brasiliensis	16
Sclerotinia sclerotiorum	16
Ashbya gossypii	15
Gibberella zeae	15
Nectria haematococca	15
Penicillium marneffei	14
Saccharomyces cerevisiae	14
Uncinocarpus reesii	14
Cochliobolus lunatus	11
Laccaria bicolor	11
Phytophthora infestans	11
Kluyveromyces lactis	10
Lachancea thermotolerans	10
Podospora anserina	10
Chaetomium globosum	9
Davidiella tassiana	9
Pichia stipitis	9
Trichophyton verrucosum	9
Ajellomyces capsulatus	8
Cochliobolus heterostrophus	8
Cryptococcus bacillisporus	8
Passalora fulva	8
Coccidioides immitis	7
Coprinopsis cinerea	7
Fusarium oxysporum	7
Pichia pastoris	7
Aspergillus oryzae	6
Emericella nidulans	6
Lodderomyces elongisporus	6
Magnaporthe oryzae	6
Metarhizium anisopliae	6
Arthroderma benhamiae	5
Cochliobolus carbonum	5
Glomerella graminicola	5
Saccharomyces cerevisiae	5
Alternaria brassicicola	4
Cochliobolus victoriae	4
Phanerochaete chrysosporium	4
Saccharomyces cerevisiae	4
Venturia inaequalis	4
Claviceps purpurea	3
Cryptococcus curvatus	3
Cryptococcus heveanensis	3
Encephalitozoon intestinalis	3
Piriformospora indica	3
Pneumocystis carinii	3
Ustilago maydis	3
Ampelomyces quisqualis	2
Antonospora locustae	2
Aspergillus niger	2
Beauveria bassiana	2
Cladosporium cladosporioides	2
Encephalitozoon cuniculi	2
Epichloe festucae	2
Filobasidiella neoformans	2
Gibberella fujikuroi	2
Glomus diaphanum	2
Glomus mosseae	2
Hortaea werneckii	2
Hypocrea jecorina	2
Moniliophthora perniciosa	2
Paecilomyces lilacinus	2
Phaeosphaeria avenaria	2
Rhizopus stolonifer	2
Saccharomyces cerevisiae	2
Scutellospora pellucida	2
Sordaria macrospora	2
Tremella fuciformis	2
Ustilago maydis	2
Vanderwaltozyma polyspora	2
Xanthophyllomyces dendrorhous	2
Agaricus bisporus	1
Ajellomyces capsulatus	1
Alternaria citri	1
Alternaria sp.	1
Asterotremella humicola	1
Aureobasidium pullulans	1
Bipolaris oryzae	1
Blastocladiella emersonii	1
Blumeria graminis	1
Calostoma ravenelii	1
Candida dubliniensis	1
Candida tropicalis	1
Capronia pilosella	1
Claviceps fusiformis	1
Colletotrichum gloeosporioides	1
Colletotrichum siamense	1
Conidiobolus coronatus	1
Coniothyrium minitans	1
Coprinellus radians	1
Corynespora cassiicola	1
Cryphonectria parasitica	1
Cryptococcus albidus	1
Falciformispora lignatilis	1
Galiella rufa	1
Glomerella cingulata	1
Hortaea acidophila	1
Hygrocybe aff.	1
Hypocrea atroviridis	1
Hypocrea lixii	1
Hypocrea strictipilosa	1
Irpex lacteus	1
labyrinthulid quahog	1
Macrophoma commelinae	1
Malassezia globosa	1
Marssonina brunnea	1
Monoblepharella sp.	1
Mycosphaerella graminicola	1
Myxozyma lipomycoides	1
Neocallimastix patriciarum	1
Neotyphodium lolii	1
Nowakowskiella elegans	1
Ophiosphaerella sasicola	1
Paecilomyces sp.	1
Paracoccidioides brasiliensis	1
Penicillium oxalicum	1
Penicillium simplicissimum	1
Phaeosphaeria sp.	1
Phaeosphaeria spartinae	1
Phoma herbarum	1
Phoma sp.	1
Phytophthora nicotianae	1
Phytophthora sojae	1
Pichia kudriavzevii	1
Pichia pastoris	1
Pleurotus eryngii	1
Pneumocystis murina	1
Polyporus grammocephalus	1
Pontogeneia inermis	1
Puccinia triticina	1
Saccharomyces bayanus	1
Saccharomyces cerevisiae	1
Saccharomyces pastorianus	1
Saprolegnia diclina	1
Schizochytrium mangrovei	1
Schizophyllum commune	1
Setosphaeria turcica	1
Smittium culisetae	1
Stemphylium vesicarium	1
Teloschistes exilis	1
Tolypocladium parasiticum	1
Trichoderma asperellum	1
Tuber borchii	1
Ulocladium capsicum	1
Ulocladium sp.	1
Volvariella volvacea	1
Xanthoparmelia sp.	1
Zygosaccharomyces bailii	1
